# Supplementary material for: Pharmacological Screening of Kv7.1 and Kv7.1/KCNE1 Activators as Potential Antiarrhythmic Drugs in the Zebrafish Heart
Source: Int J Mol Sci. 2023 Jul 28;24(15):12092. doi: 10.3390/ijms241512092 (PMC10418701; doi:10.3390/ijms241512092)
Supplement: Supplementary file 1 [file ijms-24-12092-s001.zip › ijms-2519475-supplementary.pdf]

# Supplementary Materials for

## Pharmacological Screening of Kv7.1 and Kv7.1/KCNE1 Activators as Potential Antiarrhythmic Drugs in the Zebrafish Heart

Alicia De la Cruz <sup>1</sup>, Xiaoan Wu <sup>1</sup>, Quinn C. Rainer <sup>1</sup>, Irene Hiniesto-Iñigo <sup>2</sup>, Marta E. Perez <sup>1</sup>, Isak Edler <sup>1,2</sup>, Sara I. Liin <sup>2</sup> and H. Peter Larsson <sup>1,\*</sup>

<sup>1</sup> Department of Physiology and Biophysics, Miller School of Medicine, University of Miami, 1600 NW 10th Avenue, Miami, FL 33136, USA

<sup>2</sup> Department of Biomedical and Clinical Sciences, Linköping University, SE-581 85 Linköping, Sweden

\* Correspondence: plarsson@med.miami.edu; Tel.: +1-305-243-1021

**This PDF file includes:**

Figures S1 to S6

Tables S1 to S2

## Supplementary Figures

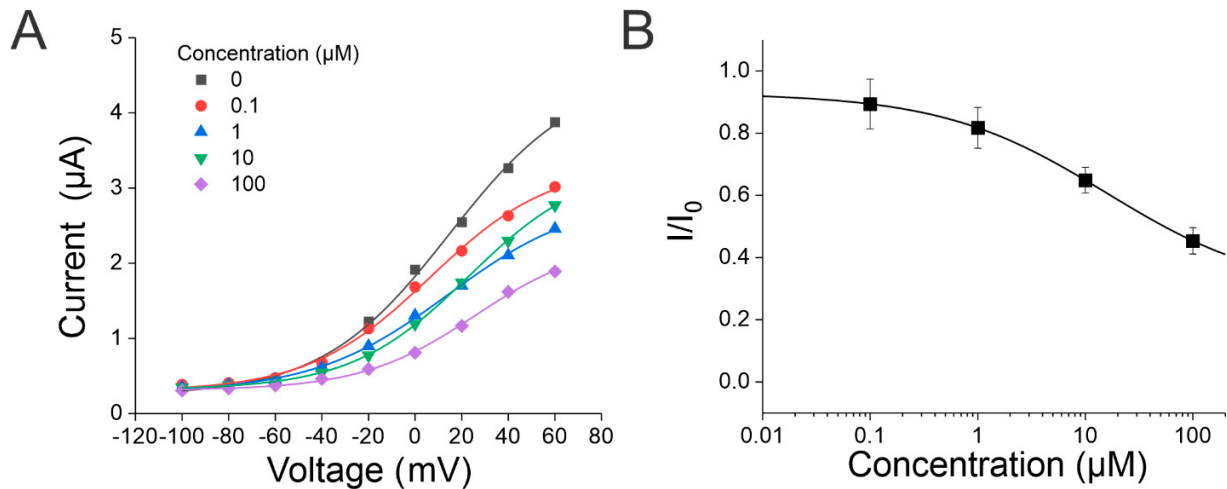

**Figure S1. JNJ303 inhibits zebrafish  $I_{Ks}$  currents recorded in *Xenopus laevis* oocytes only at very high concentrations. (A)** Representative current measurements of zebrafish Kv7.1/KCNE1 before and after the application of JNJ303 with different concentrations (from 0.01 to 100  $\mu\text{M}$ ). From a holding potential of  $-80$  mV followed by a hyperpolarizing prepulse to  $-140$  mV, currents were elicited to potential of  $+40$  mV followed by a tail voltage of  $-40$  mV. **(B)** Concentration-response relationship for the inhibition  $I_{Ks}$  by JNJ303. Inhibition was determined as a percent change in current amplitude at  $0$  mV. The data were fitted with the Hill equation ( $\text{IC}_{50} > 100$   $\mu\text{M}$ ,  $n=3$ ).

# Chromanol 293B

## zebrafish Kv7.1/KCNE1

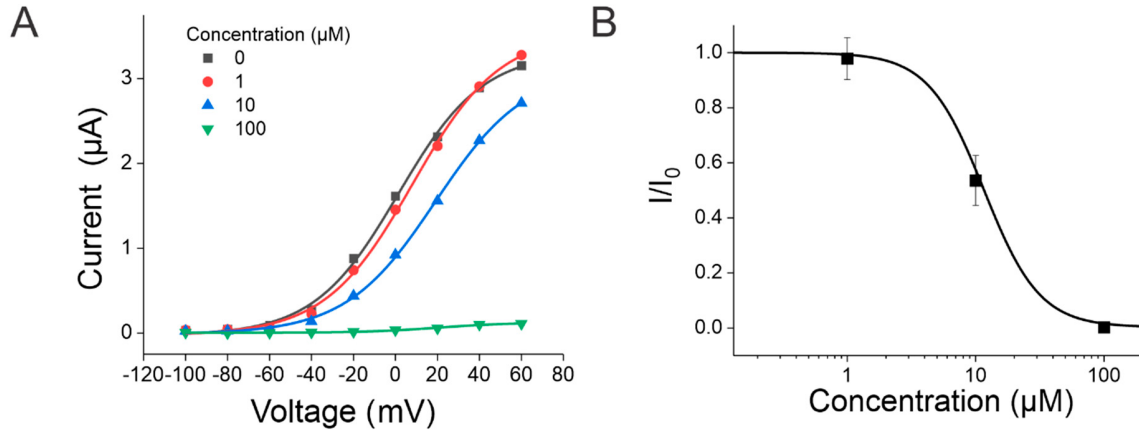

## zebrafish Kv7.1

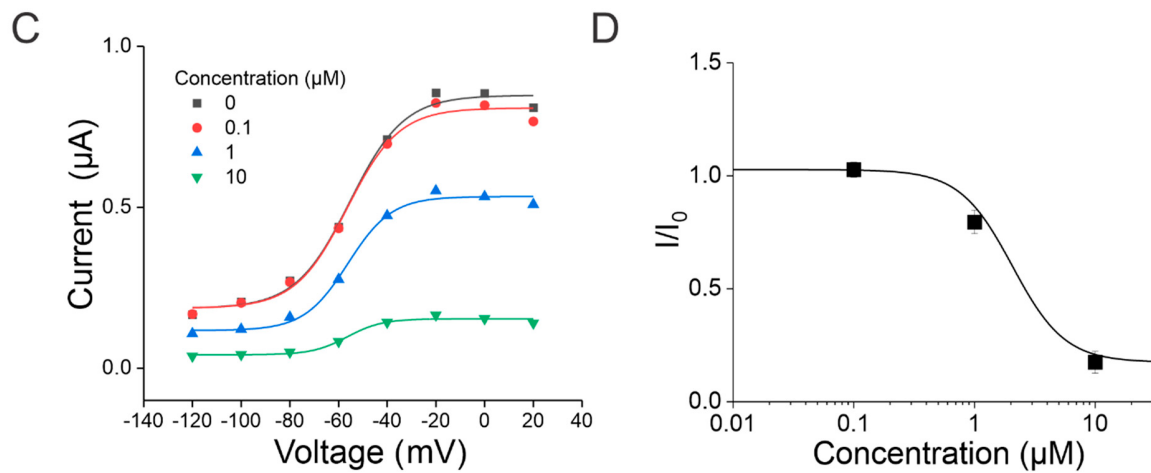

**Figure S2. Chromanol 293B inhibits zebrafish Kv7.1/KCNE1 and Kv7.1 currents recorded in *Xenopus laevis* oocytes.** (A,C) Representative current measurements of zebrafish Kv7.1/KCNE1 and Kv7.1, respectively, before and after the application of chromanol 293B with different concentrations (from 1 to 100 μM). From a holding potential of -80 mV followed by a hyperpolarizing prepulse to -140 mV, currents were elicited to potential of 0 mV followed by a tail voltage of -40 mV. (B,D) Concentration-response relationship for the inhibition Kv7.1/KCNE1 and Kv7.1 by chromanol 293B. Inhibition was determined as a percent change in current amplitude at 0 mV. The data were fitted with the Hill equation ( $IC_{50} = 11.6 \pm 0.01 \mu M$ ,  $n=5$ , and  $IC_{50} = 2.1 \pm 0.01 \mu M$ ,  $n=5$ , for Kv7.1/KCNE1 and Kv7.1, respectively).

## DHA-Gly

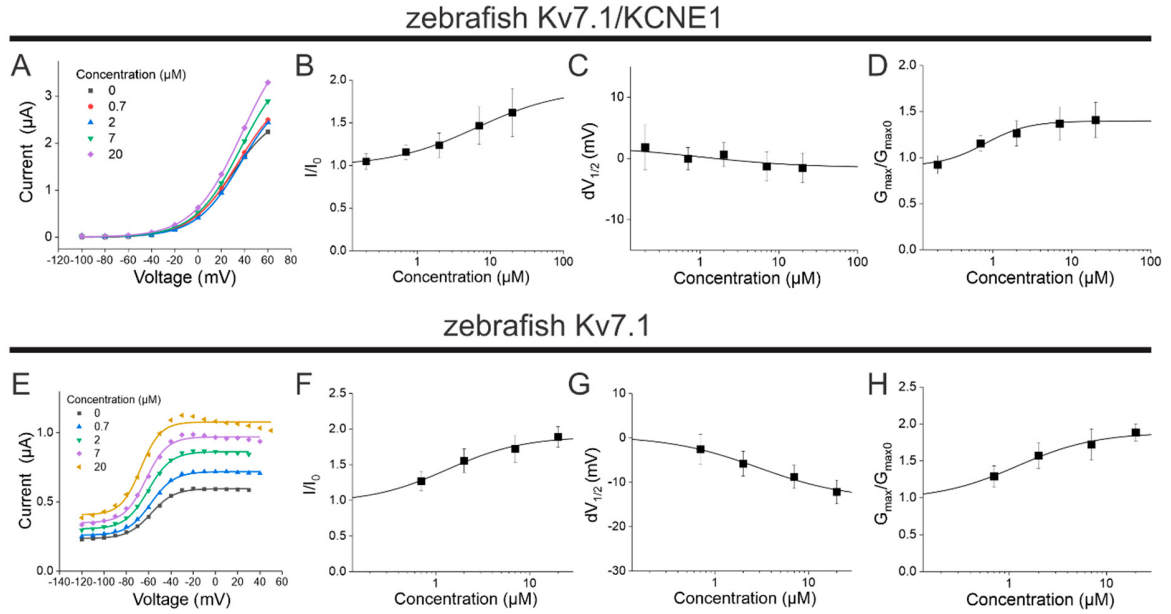

**Figure S3. DHA-Gly does not significantly increase zebrafish  $I_{Ks}$  currents recorded in *Xenopus laevis* oocytes. (A)** Representative current measurements of zebrafish Kv7.1/KCNE1 before and after the application of DHA-Gly with different concentrations (from 0.7 to 20  $\mu\text{M}$ ). From a holding potential of  $-80$  mV followed by a hyperpolarizing prepulse to  $-140$  mV, currents were elicited to a potential of  $+40$  mV followed by a tail voltage of  $-40$  mV. **(B–D)** Concentration-response relationship in the **(B)** current amplitude, **(C)** voltage dependence of activation ( $\Delta V_{1/2}$ ) and **(D)** changes in maximal conductance ( $G_{\text{max}}$ ) for Kv7.1/KCNE1 induced by DHA-Gly ( $n = 11$ , mean  $\pm$  SEM, Table S1). **(E)** Representative current measurements of zebrafish Kv7.1 before and after the application of DHA-Gly with different concentrations (from 0.7 to 20  $\mu\text{M}$ ) **(F–H)** Concentration-response relationship in the **(F)** current amplitude, **(G)** voltage dependence of activation ( $\Delta V_{1/2}$ ) and **(H)** changes in maximal conductance ( $G_{\text{max}}$ ) for Kv7.1 induced by DHA-Gly ( $n = 5$ , mean  $\pm$  SEM, Table S1). The data were fitted with the Hill equation ( $\text{IC}_{50} = 6.5 \pm 5.6 \mu\text{M}$ ,  $n=11$ , and  $\text{IC}_{50} = 1.3 \pm 3.4 \mu\text{M}$ ,  $n=4$ , for Kv7.1/KCNE1 and Kv7.1, respectively)

## LIN-Gly

### zebrafish Kv7.1/KCNE1

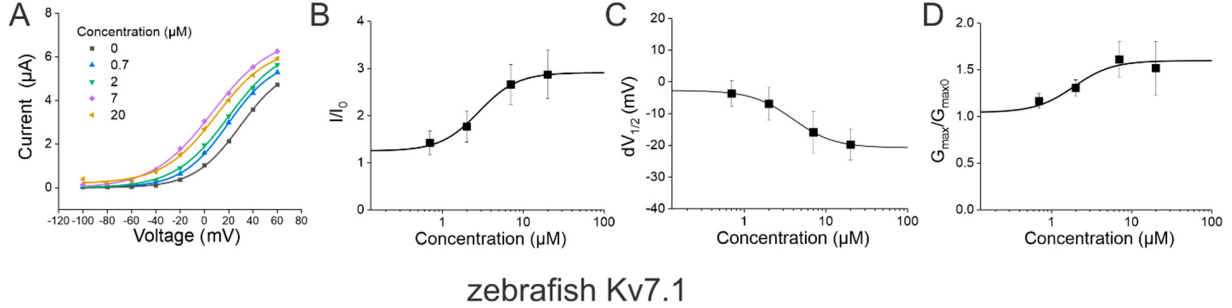

**Figure S4: LIN-Gly increases significantly zebrafish Kv7.1/KCNE1 and Kv7.1 currents recorded in *Xenopus laevis* oocytes.** (A) Representative current measurements of zebrafish Kv7.1/KCNE1 before and after the application of LIN-Gly with different concentrations (from 0.7 to 20  $\mu\text{M}$ ). From a holding potential of  $-80$  mV followed by a hyperpolarizing prepulse to  $-140$  mV, currents were elicited to a potential of  $+40$  mV followed by a tail voltage of  $-40$  mV. (B–D) Concentration-response relationship in the (B) current amplitude, (C) voltage dependence of activation ( $\Delta V_{1/2}$ ) and (D) changes in maximal conductance ( $G_{\text{max}}$ ) for Kv7.1/KCNE1 induced by LIN-Gly ( $n = 7$ , mean  $\pm$  SEM, Table S1). (E) Representative current measurements of zebrafish Kv7.1 before and after the application of LIN-Gly with different concentrations (from 0.7 to 20  $\mu\text{M}$ ) (F–H) Concentration-response relationship in the (F) current amplitude, (G) voltage dependence of activation ( $\Delta V_{1/2}$ ) and (H) changes in maximal conductance ( $G_{\text{max}}$ ) for Kv7.1 induced by LIN-Gly ( $n = 6$ , mean  $\pm$  SEM, Table S2). The data were fitted with the Hill equation ( $\text{IC}_{50} = 2.8 \pm 1.7$   $\mu\text{M}$ ,  $n=7$ , and  $\text{IC}_{50} = 3.6 \pm 0.01$   $\mu\text{M}$ ,  $n=6$ , for Kv7.1/KCNE1 and Kv7.1, respectively)

## ML-277

### zebrafish Kv7.1/KCNE1

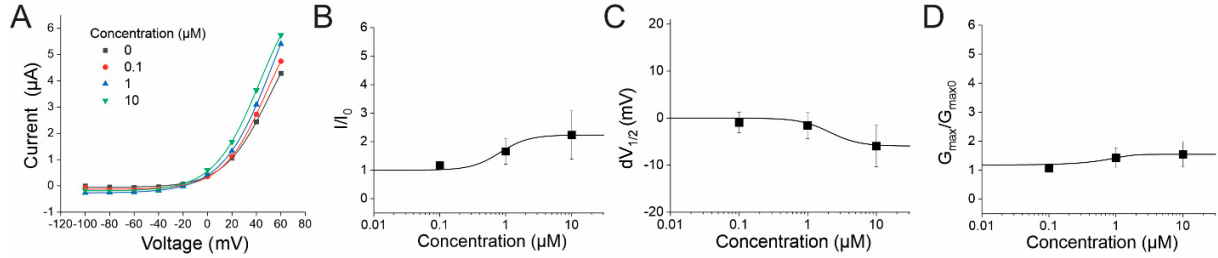

### zebrafish Kv7.1

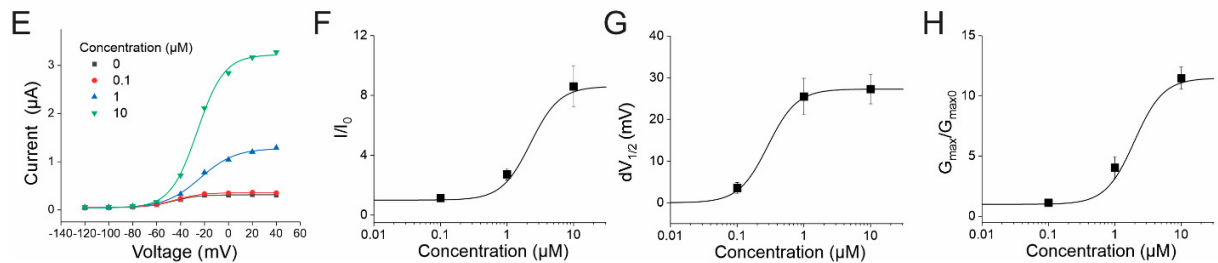

**Figure S5. ML-277 effects on zebrafish Kv7.1/KCNE1 and Kv7.1 currents recorded in *Xenopus laevis* oocytes.** (A) Representative current measurements of zebrafish Kv7.1/KCNE1 before and after the application of ML-277 with different concentrations (from 0.1 to 10  $\mu\text{M}$ ). From a holding a potential of  $-80$  mV followed by a hyperpolarizing prepulse to  $-140$  mV, currents were elicited to potential of  $+40$  mV followed by a tail voltage of  $-40$  mV. (B–D) Concentration-response relationship in the (B) current amplitude, (C) voltage dependence of activation ( $\Delta V_{1/2}$ ) and (D) changes in maximal conductance ( $G_{\text{max}}$ ) for Kv7.1/KCNE1 induced by ML-277 ( $n = 6$ , mean  $\pm$  SEM, Table S1). (E) Representative current measurements of zebrafish Kv7.1 before and after the application of ML-277 with different concentrations (from 0.1 to 10  $\mu\text{M}$ ) (F–H) Concentration-response relationship in the (F) current amplitude, (G) voltage dependence of activation ( $\Delta V_{1/2}$ ) and (H) changes in maximal conductance ( $G_{\text{max}}$ ) for Kv7.1 induced by ML-277 ( $n = 6$ , mean  $\pm$  SEM, Table S2). The data were fitted with the Hill equation ( $\text{IC}_{50} = 0.8 \pm 0.01$   $\mu\text{M}$ ,  $n=6$ , and  $\text{IC}_{50} = 2.3 \pm 0.01$   $\mu\text{M}$ ,  $n=6$ , for Kv7.1/KCNE1 and Kv7.1, respectively)

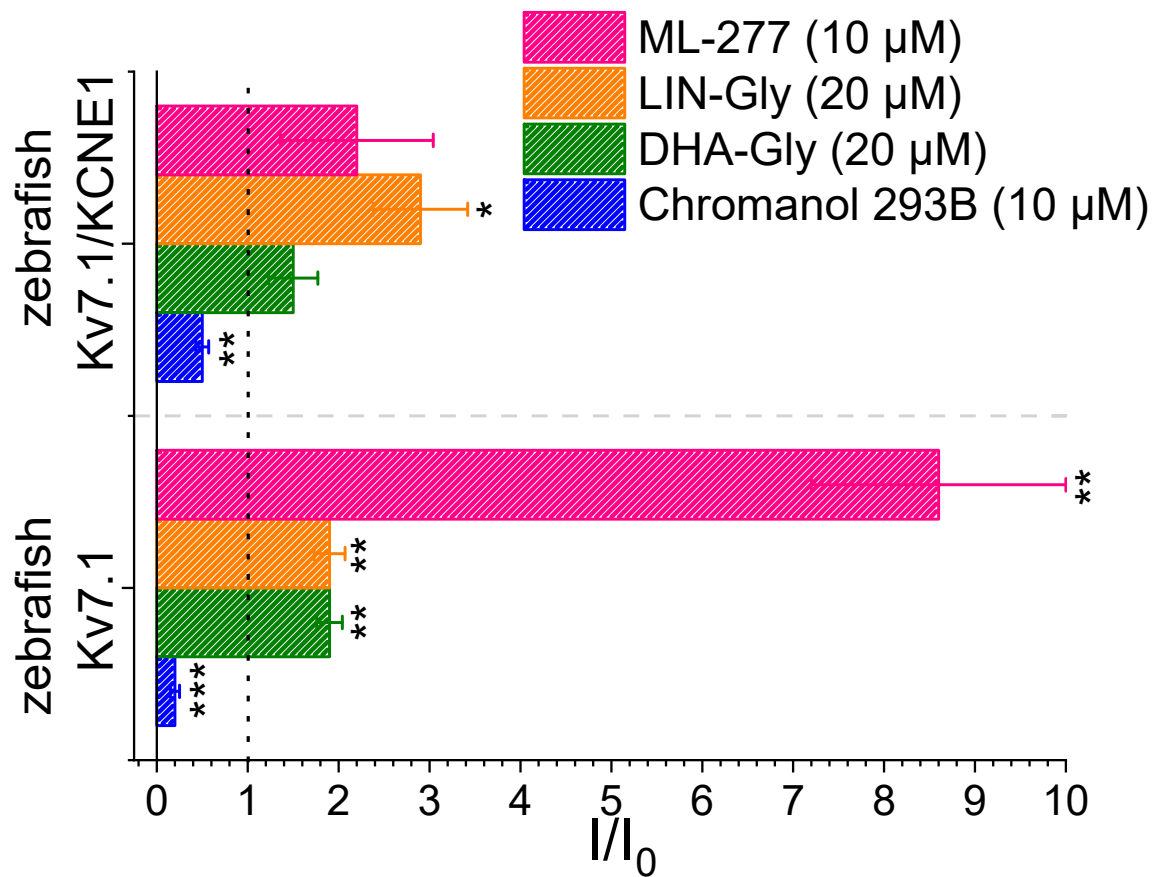

**Figure S6: Summary of zebrafish Kv7.1/KCNE1 and Kv7.1 blockers and activators effects recorded in *Xenopus laevis* oocytes.** The summary was performed from data of the zebrafish Kv7.1/KCNE1 and Kv7.1 blocker (chromanol 293B) and activators (DHA-Gly, LIN-Gly, and ML-277). Bars are showing the effects of these compounds on the  $I/I_0$  for zebrafish Kv7.1/KCNE1 and Kv7.1 recorded in *Xenopus laevis* oocytes (mean  $\pm$  SEM, \* $p < 0.05$ , \*\* $p < 0.01$ , and \*\*\* $p < 0.001$ ).

## Supplementary Tables

### Supplementary Table S1. Zebrafish $I_{Ks}$ measurements in *Xenopus laevis* oocytes for $I_{Ks}$ inhibitors, and $I_{Ks}$ activator and PUFA analogues.

|                                        | $\Delta V_{0.5}$ | (n, p)                  | $G_{max}/G_{max0}$ | (n, p)                  | $I/I_0$        | (n, p)                  |
|----------------------------------------|------------------|-------------------------|--------------------|-------------------------|----------------|-------------------------|
| <b>C293B (10 <math>\mu M</math>)</b>   | $10.9 \pm 2.9$   | n = 5,<br>p < 0.05      | $0.8 \pm 0.07$     | n = 5, NS,<br>p > 0.05  | $0.5 \pm 0.07$ | n = 5,<br>p < 0.01      |
| <b>ML-277 (1 <math>\mu M</math>)</b>   | $-1.6 \pm 2.8$   | n = 6, NS,<br>p > 0.05  | $1.4 \pm 0.32$     | n = 6, NS,<br>p > 0.05  | $1.7 \pm 0.45$ | n = 6, NS,<br>p > 0.05  |
| <b>DHA-Gly (20 <math>\mu M</math>)</b> | $-0.5 \pm 2.4$   | n = 11, NS,<br>p > 0.05 | $1.4 \pm 0.20$     | n = 11, NS,<br>p > 0.05 | $1.5 \pm 0.27$ | n = 11, NS,<br>p > 0.05 |
| <b>LIN-Gly (20 <math>\mu M</math>)</b> | $-19.8 \pm 4.9$  | n = 7,<br>p < 0.01      | $1.5 \pm 0.29$     | n = 7, NS,<br>p > 0.05  | $2.9 \pm 0.52$ | n = 7,<br>p < 0.05      |

### Supplementary Table S2. Zebrafish Kv7.1 measurements in *Xenopus laevis* oocytes for Kv7.1 inhibitors, and Kv7.1 activator and PUFA analogues.

|                                        | $\Delta V_{0.5}$ | (n, p)                 | $G_{max}/G_{max0}$ | (n, p)              | $I/I_0$        | (n, p)              |
|----------------------------------------|------------------|------------------------|--------------------|---------------------|----------------|---------------------|
| <b>C293B (10 <math>\mu M</math>)</b>   | $2.0 \pm 1.1$    | n = 5, NS,<br>p > 0.05 | $0.2 \pm 0.05$     | n = 5,<br>p < 0.001 | $0.2 \pm 0.05$ | n = 5,<br>p < 0.001 |
| <b>ML-277 (1 <math>\mu M</math>)</b>   | $26.5 \pm 4.6$   | n = 6,<br>p < 0.01     | $4.0 \pm 0.76$     | n = 6,<br>p < 0.05  | $2.7 \pm 0.38$ | n = 6,<br>p < 0.01  |
| <b>DHA-Gly (20 <math>\mu M</math>)</b> | $-12.2 \pm 2.7$  | n = 4,<br>p < 0.05     | $1.9 \pm 0.11$     | n = 4,<br>p < 0.01  | $1.9 \pm 0.14$ | n = 4,<br>p < 0.01  |
| <b>LIN-Gly (20 <math>\mu M</math>)</b> | $-17.9 \pm 1.5$  | n = 6,<br>p < 0.001    | $1.8 \pm 0.16$     | n = 6,<br>p < 0.01  | $1.9 \pm 0.17$ | n = 6,<br>p < 0.01  |
